# Supplementary material for: Lithium storage in a highly conductive Cu3Ge boosted Ge/graphene aerogel
Source: Royal Society of Chemistry journal article supplement (doi:10.1039/c5ta06862b), 2015-01-01
Supplement: c5ta06862b1.pdf [file c5ta06862b1.pdf]

## Supporting information

### Lithium storage of highly conductive $\text{Cu}_3\text{Ge}$ boosted Ge/graphene aerogel

Chuanjian Zhang,<sup>a</sup> Fenglian Chai,<sup>ab</sup> Lin Fu,<sup>a</sup> Pu Hu,<sup>a</sup> Shuping Pang,<sup>a</sup> and Guanglei Cui<sup>\*a</sup>

<sup>a</sup> Qingdao Industrial Energy Storage Research Institute, Qingdao Institute of Bioenergy and Bioprocess Technology, Chinese Academy of Sciences, No.189 Songling Road, Laoshan District, Qingdao, 266101, PR China

<sup>b</sup> College of Chemistry and Molecular Engineering, Qingdao University of Science and Technology, No. 53 Zhengzhou Road, Qingdao, 266042, PR China

E-mail: cuigl@qibebt.ac.cn

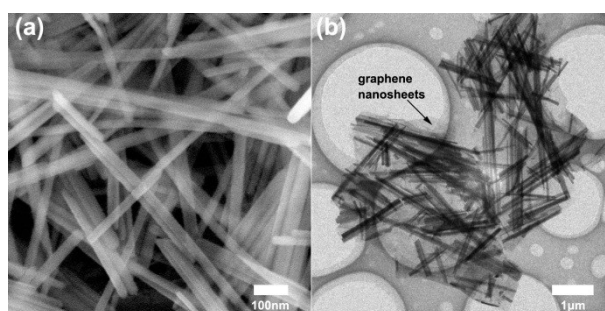

**Fig. S1** (a) SEM images of  $\text{CuGeO}_3$  NWs, (b) TEM image of  $\text{CuGeO}_3$  NWs/G hydrogel.

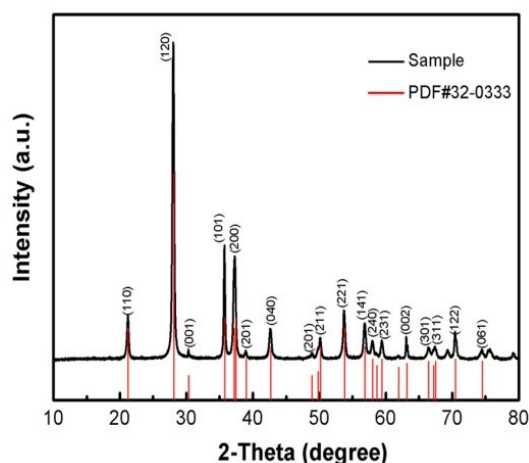

**Fig. S2** XRD pattern of  $\text{CuGeO}_3$  NWs/G hydrogel.

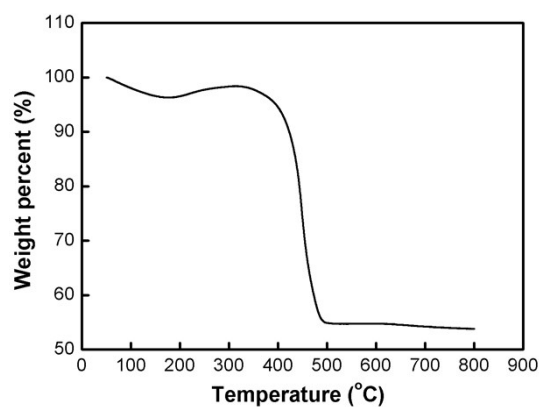

**Fig. S3** TG curve of  $\text{Cu}_3\text{Ge}/\text{Ge@G}$  aerogel. The result shows that the composite contains 39.95 wt%  $\text{Cu}_3\text{Ge}/\text{Ge}$  and 60.05 wt% graphene based on the weight loss upon graphene combustion and that  $\text{Cu}_3\text{Ge}/\text{Ge}$  is fully oxidized to  $\text{CuGeO}_3$  ( $\text{CuO}-\text{GeO}_2$ ) in air. The weight loss that commences around 400 °C is caused by the graphene combustion reaction.

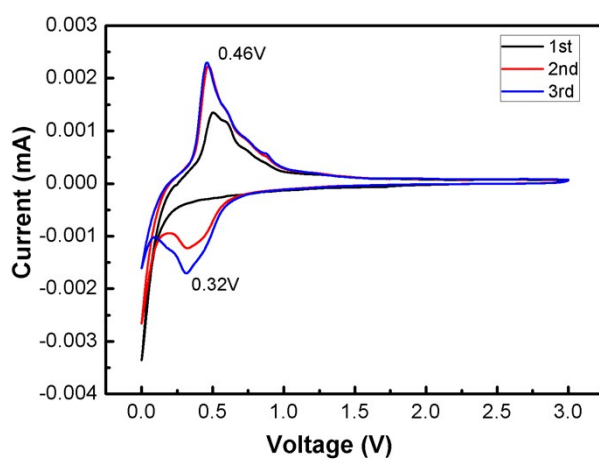

**Fig. S4** Cyclic voltammograms of  $\text{Cu}_3\text{Ge}/\text{Ge@G}$  aerogel at a scanning rate of  $0.2 \text{ mV s}^{-1}$  from 0.005 to 3 V versus  $\text{Li}/\text{Li}^+$

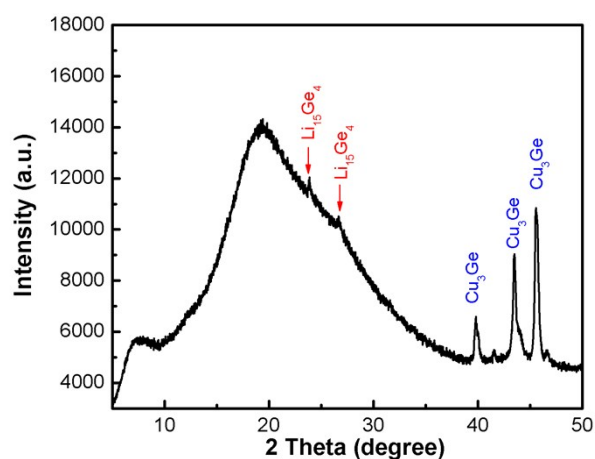

**Fig. S5** Ex-situ XRD pattern of  $\text{Cu}_3\text{Ge}/\text{Ge}@G$  aerogel when lithiated to 5 mV. The hump located around 20 degree is associated to the signal of Kapton film for the test setup.

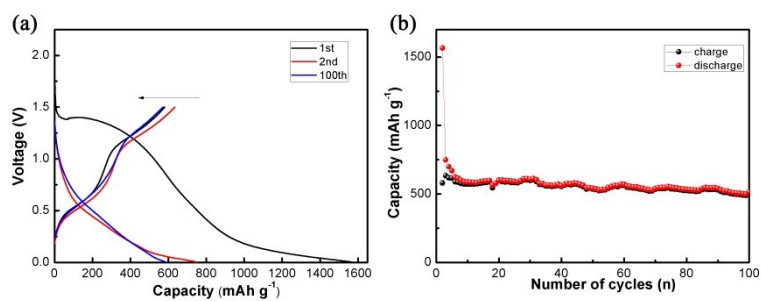

**Fig. S6** Voltage profile (a) and cycling performance (b) of bare  $\text{CuGeO}_3$  NWs a current density of 0.1 C.

**Tab. S1** Equivalent circuit and corresponding fitted parameters of the EIS spectrum.

| Equivalent circuit | Sample                                              | $R_s/\Omega$ | $R_1/\Omega$ | $R_{ct}/\Omega$ |
|--------------------|-----------------------------------------------------|--------------|--------------|-----------------|
|                    | $\text{Cu}_3\text{Ge}/\text{Ge}@G$ as-assembled     | 6.2          | 16.2         | 98.7            |
|                    | $\text{Cu}_3\text{Ge}/\text{Ge}@G$ after 100 cycles | 6.46         | 4.384        | 3.6             |
|                    | $\text{Cu}_3\text{Ge}/\text{Ge}$ as-assembled       | 9.285        | 18.95        | 140.2           |
|                    | $\text{Cu}_3\text{Ge}/\text{Ge}$ after 100 cycles   | 8.762        | 232          | 641.2           |

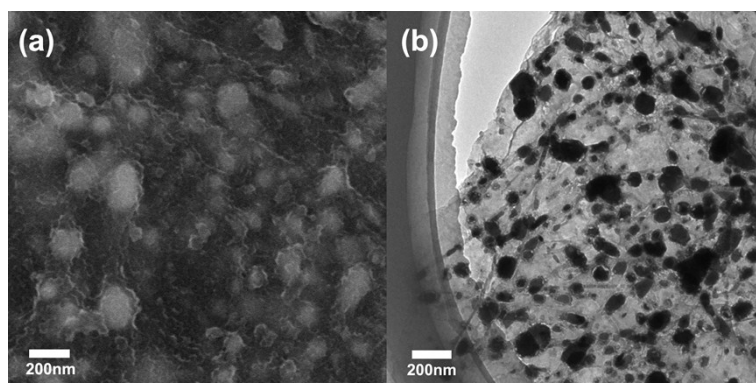

**Fig. S7** SEM (a) and TEM (b) images of  $\text{Cu}_3\text{Ge}/\text{Ge}@G$  aerogel after cycled for 100 cycles at 0.1 C.
